# Supplementary material
Source: PubMed Central journal article supplement (PMC9758592)
Supplement: mmc1.pdf [file mmc1.pdf]

## Supplemental Appendix

This Supplemental Appendix provides additional information supporting the results in the main manuscript.

- Table [A1](#) reports descriptive results on coronavirus awareness, beliefs, and behavior in tabular form. These results report the underlying information used when generating Figure [3](#) in the main manuscript.
- Table [A2](#) reports descriptive results on self-reported coronavirus pandemic impacts. These results report the underlying information used when generating Figure [7](#) in the main manuscript.
- Table [A3](#) reports descriptive results on the coronavirus pandemic and food security challenges in tabular form. These results report the underlying information used when generating Figure [5](#) in the main manuscript.
- Table [A4](#) shows a robustness test on the results reported in Panel A of Table [1](#) in the main manuscript. Instead of standardizing the raw FIES score to have a mean of zero and standard deviation of one in each survey wave, the dependent variable in Table [A4](#) is left as the raw non-standardized FIES score. These results show that the estimates in Panel A of Table [1](#) of the main manuscript are not driven by this standardization procedure.
- Table [A5](#) shows a robustness test on the results reported in Table [1](#) by not controlling for missing observations. This tests if our results are driven by systematic non-response to specific survey questions. The results shown in Table [A5](#) are qualitatively consistent with the results reported in Table [1](#) and therefore highlight that our results are not driven by systematic non-response.
- Table [A6](#) shows a robustness test on the results reported in Panels B through D in Table [1](#) in the main manuscript. Specifically, households in Bamako are intentionally omitted from the results reported in Table [A6](#). These results show that the results reported in Panels B through D in Table [1](#) in the main manuscript are not primarily driven by the effect of the coronavirus pandemic in Bamako, but qualitatively persist when excluding Bamako from the estimation specification.

Figure A1: COVID-19 Government's Response Stringency Index

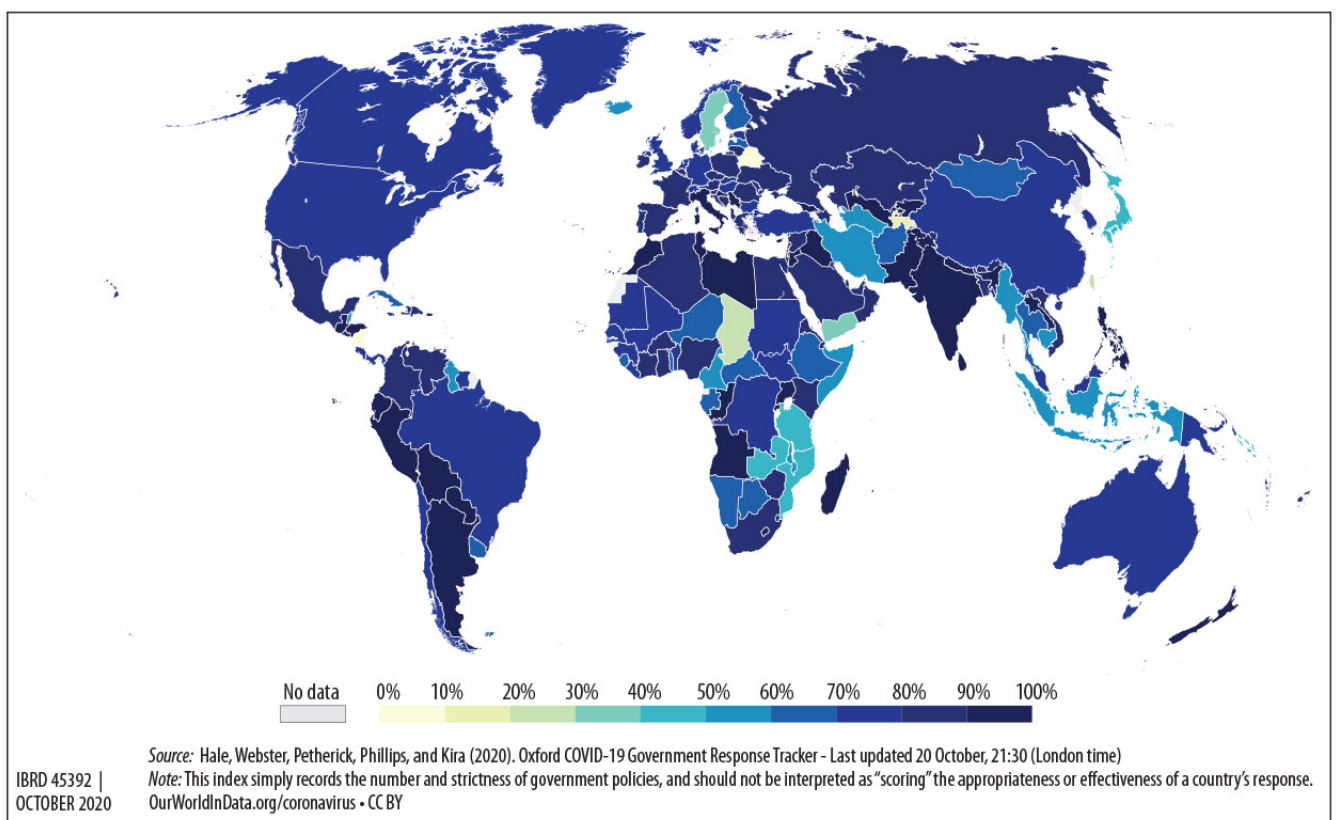

Table A1: Coronavirus Pandemic Awareness, Beliefs, and Behavior

| Variable                                                                         | (1)<br>Urban  |                  | (2)<br>Rural |                  | (3)<br>Total  |                  | T-test<br>Difference<br>(1)-(2) |
|----------------------------------------------------------------------------------|---------------|------------------|--------------|------------------|---------------|------------------|---------------------------------|
|                                                                                  | N/[Clusters]  | Mean/SE          | N/[Clusters] | Mean/SE          | N/[Clusters]  | Mean/SE          |                                 |
| Have you heard of coronavirus?                                                   | 1219<br>[214] | 0.997<br>(0.001) | 547<br>[228] | 0.991<br>(0.004) | 1766<br>[442] | 0.993<br>(0.003) | 0.006                           |
| Have you received information about social distancing and self-isolation measure | 1214<br>[214] | 0.963<br>(0.007) | 542<br>[227] | 0.951<br>(0.010) | 1756<br>[441] | 0.954<br>(0.007) | 0.012                           |
| Are you satisfied with the government's response to the coronavirus?             | 1170<br>[214] | 0.811<br>(0.014) | 515<br>[227] | 0.870<br>(0.016) | 1685<br>[441] | 0.853<br>(0.012) | -0.059***                       |
| Last week, did you wash your hands more often than usual?                        | 1218<br>[214] | 0.934<br>(0.008) | 547<br>[228] | 0.867<br>(0.016) | 1765<br>[442] | 0.887<br>(0.012) | 0.067***                        |
| Last week, did you avoid shaking hands or other greetings with physical contact? | 1218<br>[214] | 0.926<br>(0.008) | 547<br>[228] | 0.814<br>(0.019) | 1765<br>[442] | 0.846<br>(0.014) | 0.111***                        |
| Last week, did you avoid gatherings of more than 10 people?                      | 1219<br>[214] | 0.861<br>(0.014) | 547<br>[228] | 0.811<br>(0.020) | 1766<br>[442] | 0.825<br>(0.015) | 0.050**                         |
| Last week, did you cancel any travel plans?                                      | 1218<br>[214] | 0.706<br>(0.013) | 546<br>[228] | 0.691<br>(0.022) | 1764<br>[442] | 0.695<br>(0.016) | 0.015                           |
| Last week, did you stockpile more food than usual?                               | 1219<br>[214] | 0.290<br>(0.016) | 547<br>[228] | 0.285<br>(0.022) | 1766<br>[442] | 0.287<br>(0.016) | 0.004                           |
| Last week, did you reduce the number of times you went to the market or grocery  | 1219<br>[214] | 0.676<br>(0.016) | 547<br>[228] | 0.672<br>(0.024) | 1766<br>[442] | 0.673<br>(0.017) | 0.004                           |
| Last week, did you reduce the number of times you went to a place of worship?    | 1219<br>[214] | 0.641<br>(0.015) | 547<br>[228] | 0.607<br>(0.025) | 1766<br>[442] | 0.617<br>(0.018) | 0.033                           |

Notes: These descriptive statistics come from the World Bank's COVID-19 high frequency survey from Mali. Missing and refused responses are excluded from these statistics. Standard errors clustered at the sampling cluster level. \*\*\*, \*\*, and \* indicate statistical significance at the 1, 5, and 10 percent critical level.

Table A2: Self-Reported Coronavirus Pandemic Impacts

| Variable                                                                | (1)<br>Urban  |                  | (2)<br>Rural |                  | (3)<br>Total  |                  | T-test<br>Difference<br>(1)-(2) |
|-------------------------------------------------------------------------|---------------|------------------|--------------|------------------|---------------|------------------|---------------------------------|
|                                                                         | N/[Clusters]  | Mean/SE          | N/[Clusters] | Mean/SE          | N/[Clusters]  | Mean/SE          |                                 |
| My household is at risk of losing income due to the pandemic.           | 1036<br>[214] | 0.473<br>(0.018) | 486<br>[223] | 0.433<br>(0.027) | 1522<br>[437] | 0.444<br>(0.020) | 0.040                           |
| A household member has lost a job due to the pandemic.                  | 1219<br>[214] | 0.286<br>(0.015) | 547<br>[228] | 0.270<br>(0.021) | 1766<br>[442] | 0.274<br>(0.015) | 0.017                           |
| My household has lost income due to the pandemic.                       | 1219<br>[214] | 0.536<br>(0.016) | 547<br>[228] | 0.529<br>(0.025) | 1766<br>[442] | 0.531<br>(0.018) | 0.007                           |
| My household struggles to pay rent due to the pandemic.                 | 1219<br>[214] | 0.311<br>(0.017) | 547<br>[228] | 0.108<br>(0.021) | 1766<br>[442] | 0.167<br>(0.016) | 0.203***                        |
| My household struggles to buy food due to the pandemic.                 | 1219<br>[214] | 0.515<br>(0.022) | 547<br>[228] | 0.462<br>(0.027) | 1766<br>[442] | 0.478<br>(0.020) | 0.053                           |
| My household struggles to access water/electricity due to the pandemic. | 1219<br>[214] | 0.490<br>(0.019) | 547<br>[228] | 0.207<br>(0.030) | 1766<br>[442] | 0.289<br>(0.022) | 0.283***                        |
| My household reduced saving due to the pandemic.                        | 1219<br>[214] | 0.734<br>(0.015) | 547<br>[228] | 0.678<br>(0.024) | 1766<br>[442] | 0.694<br>(0.017) | 0.056**                         |
| My household reduced investment due to the pandemic.                    | 1219<br>[214] | 0.681<br>(0.017) | 547<br>[228] | 0.624<br>(0.024) | 1766<br>[442] | 0.641<br>(0.018) | 0.057*                          |

Notes: These descriptive statistics come from the World Bank's COVID-19 high frequency survey from Mali. Missing and refused responses are excluded from these statistics. Standard errors clustered at the sampling cluster level. \*\*\*, \*\*, and \* indicate statistical significance at the 1, 5, and 10 percent critical level.

Table A3: The Coronavirus Pandemic and Food Security Challenges—Descriptive Results

| Variable                                                             | (1)<br>Urban  |                  | (2)<br>Rural |                  | (3)<br>Total  |                  | T-test<br>Difference<br>(1)-(2) |
|----------------------------------------------------------------------|---------------|------------------|--------------|------------------|---------------|------------------|---------------------------------|
|                                                                      | N/[Clusters]  | Mean/SE          | N/[Clusters] | Mean/SE          | N/[Clusters]  | Mean/SE          |                                 |
| (FS1) ... have been worried that you will not have enough to eat?    | 1217<br>[214] | 0.507<br>(0.018) | 544<br>[228] | 0.550<br>(0.022) | 1761<br>[442] | 0.537<br>(0.016) | -0.043                          |
| ...Was this specifically due to COVID-19?                            | 601<br>[190]  | 0.707<br>(0.020) | 287<br>[179] | 0.623<br>(0.035) | 888<br>[369]  | 0.646<br>(0.026) | 0.084**                         |
| (FS2) ... have been worried that you could not eat nutritious foods? | 1215<br>[214] | 0.424<br>(0.019) | 541<br>[228] | 0.476<br>(0.026) | 1756<br>[442] | 0.461<br>(0.019) | -0.052                          |
| ...Was this specifically due to COVID-19?                            | 494<br>[187]  | 0.653<br>(0.024) | 260<br>[165] | 0.528<br>(0.036) | 754<br>[352]  | 0.562<br>(0.027) | 0.125***                        |
| (FS3) ... had to eat always the same thing?                          | 1217<br>[214] | 0.328<br>(0.019) | 546<br>[228] | 0.367<br>(0.026) | 1763<br>[442] | 0.356<br>(0.019) | -0.039                          |
| ...Was this specifically due to COVID-19?                            | 381<br>[179]  | 0.711<br>(0.023) | 191<br>[135] | 0.575<br>(0.042) | 572<br>[314]  | 0.611<br>(0.031) | 0.136***                        |
| (FS4) ... had to skip a meal?                                        | 1216<br>[214] | 0.151<br>(0.015) | 545<br>[228] | 0.139<br>(0.019) | 1761<br>[442] | 0.143<br>(0.014) | 0.012                           |
| ...Was this specifically due to COVID-19?                            | 171<br>[112]  | 0.632<br>(0.039) | 69<br>[60]   | 0.569<br>(0.063) | 240<br>[172]  | 0.588<br>(0.045) | 0.063                           |
| (FS5) ... had to eat less than they should?                          | 1215<br>[214] | 0.227<br>(0.016) | 545<br>[228] | 0.190<br>(0.018) | 1760<br>[442] | 0.200<br>(0.014) | 0.037                           |
| ...Was this specifically due to COVID-19?                            | 257<br>[145]  | 0.688<br>(0.030) | 103<br>[88]  | 0.547<br>(0.053) | 360<br>[233]  | 0.594<br>(0.037) | 0.141**                         |
| (FS6) ... found nothing to eat at home?                              | 1217<br>[214] | 0.103<br>(0.011) | 543<br>[228] | 0.100<br>(0.017) | 1760<br>[442] | 0.101<br>(0.012) | 0.003                           |
| ...Was this specifically due to COVID-19?                            | 124<br>[91]   | 0.656<br>(0.046) | 48<br>[39]   | 0.699<br>(0.078) | 172<br>[130]  | 0.686<br>(0.056) | -0.044                          |
| (FS7) ... been hungry but did not eat?                               | 1215<br>[214] | 0.096<br>(0.011) | 545<br>[228] | 0.102<br>(0.017) | 1760<br>[442] | 0.100<br>(0.012) | -0.006                          |
| ...Was this specifically due to COVID-19?                            | 115<br>[85]   | 0.683<br>(0.042) | 52<br>[44]   | 0.720<br>(0.062) | 167<br>[129]  | 0.710<br>(0.046) | -0.037                          |
| (FSS) ... not eaten all day?                                         | 1217<br>[214] | 0.040<br>(0.007) | 542<br>[228] | 0.042<br>(0.011) | 1759<br>[442] | 0.041<br>(0.008) | -0.002                          |
| ...Was this specifically due to COVID-19?                            | 46<br>[41]    | 0.653<br>(0.084) | 20<br>[19]   | 0.688<br>(0.120) | 66<br>[60]    | 0.678<br>(0.088) | -0.035                          |

Notes: These descriptive statistics come from the World Bank's COVID-19 high frequency survey from Mali. Missing and refused responses are excluded from these statistics. Standard errors clustered at the sampling cluster level. \*\*\*, \*\*, and \* indicate statistical significance at the 1, 5, and 10 percent critical level.

Table A4: Robustness—Raw FIES Score (DV Not Standardized)

|                              | (1)<br>First-Difference | (2)                | (3)<br>Urban-Rural DID | (4)               | (5)<br>Bamako-Else DID | (6)                |
|------------------------------|-------------------------|--------------------|------------------------|-------------------|------------------------|--------------------|
| After COVID started          | -0.0209<br>(0.115)      | -0.0106<br>(0.163) | -0.141<br>(0.156)      | -0.131<br>(0.224) | -0.0662<br>(0.130)     | -0.0549<br>(0.186) |
| Urban                        |                         |                    | -0.489***<br>(0.143)   |                   |                        |                    |
| After COVID started × Urban  |                         |                    | 0.414**<br>(0.176)     | 0.410<br>(0.250)  |                        |                    |
| Bamako                       |                         |                    |                        |                   | -0.487***<br>(0.138)   |                    |
| After COVID started × Bamako |                         |                    |                        |                   | 0.336*<br>(0.179)      | 0.324<br>(0.251)   |
| Observations                 | 3532                    | 3532               | 3532                   | 3532              | 3532                   | 3532               |
| $R^2$                        | 0.010                   | 0.602              | 0.015                  | 0.604             | 0.013                  | 0.603              |
| Household FEs                | No                      | Yes                | No                     | Yes               | No                     | Yes                |
| Missing Control              | Yes                     | Yes                | Yes                    | Yes               | Yes                    | Yes                |
| Baseline Mean                | 1.91                    | 1.91               | 2.05                   | 2.05              | 1.98                   | 1.98               |

*Notes:* In columns (1) and (2), the “Baseline Mean” represents the pre-pandemic mean of the outcome variable in each panel. In the last four columns, the “Baseline Mean” represents the pre-pandemic mean of the outcome variable in the comparison area—e.g., rural areas in columns (3) and (4) and non-Bamako areas in columns (5) and (6). Standard errors are clustered at the sampling cluster level. \*\*\*, \*\*, and \*, in each graph’s label indicate statistical significance at the 1, 5, and 10 percent critical level, respectively.

Table A5: Robustness—Not Controlling for Missing Observations

|                                                             | First-Difference     |                      | Urban-Rural DID        |                     | Bamako-Else DID        |                     |
|-------------------------------------------------------------|----------------------|----------------------|------------------------|---------------------|------------------------|---------------------|
| <b>Panel A: Standardized Raw FIES Score</b>                 |                      |                      |                        |                     |                        |                     |
| After COVID started                                         | 2.66e-08<br>(0.0533) | 2.66e-08<br>(0.0754) | -0.0526<br>(0.0728)    | -0.0526<br>(0.103)  | -0.0191<br>(0.0607)    | -0.0191<br>(0.0859) |
| Urban                                                       |                      |                      | -0.219***<br>(0.0659)  |                     |                        |                     |
| After COVID started × Urban                                 |                      |                      | 0.182**<br>(0.0827)    | 0.182<br>(0.117)    |                        |                     |
| Bamako                                                      |                      |                      |                        |                     | -0.215***<br>(0.0634)  |                     |
| After COVID started × Bamako                                |                      |                      |                        |                     | 0.141<br>(0.0860)      | 0.141<br>(0.122)    |
| Baseline Mean                                               | -0.00                | -0.00                | 0.06                   | 0.06                | 0.03                   | 0.03                |
| <b>Panel B: Mild Food Insecurity (Raw Score &gt; 0)</b>     |                      |                      |                        |                     |                        |                     |
| After COVID started                                         | 0.0536**<br>(0.0254) | 0.0536<br>(0.0359)   | 0.0312<br>(0.0348)     | 0.0312<br>(0.0492)  | 0.0403<br>(0.0290)     | 0.0403<br>(0.0409)  |
| Urban                                                       |                      |                      | -0.122***<br>(0.0331)  |                     |                        |                     |
| After COVID started × Urban                                 |                      |                      | 0.0773*<br>(0.0404)    | 0.0773<br>(0.0571)  |                        |                     |
| Bamako                                                      |                      |                      |                        |                     | -0.141***<br>(0.0323)  |                     |
| After COVID started × Bamako                                |                      |                      |                        |                     | 0.0987**<br>(0.0411)   | 0.0987*<br>(0.0581) |
| Baseline Mean                                               | 0.59                 | 0.59                 | 0.63                   | 0.63                | 0.61                   | 0.61                |
| <b>Panel C: Moderate Food Insecurity (Raw Score &gt; 3)</b> |                      |                      |                        |                     |                        |                     |
| After COVID started                                         | -0.0260<br>(0.0226)  | -0.0260<br>(0.0319)  | -0.0504*<br>(0.0305)   | -0.0504<br>(0.0432) | -0.0350<br>(0.0256)    | -0.0350<br>(0.0361) |
| Urban                                                       |                      |                      | -0.0819***<br>(0.0262) |                     |                        |                     |
| After COVID started × Urban                                 |                      |                      | 0.0845**<br>(0.0350)   | 0.0845*<br>(0.0495) |                        |                     |
| Bamako                                                      |                      |                      |                        |                     | -0.0830***<br>(0.0260) |                     |
| After COVID started × Bamako                                |                      |                      |                        |                     | 0.0670*<br>(0.0374)    | 0.0670<br>(0.0529)  |
| Baseline Mean                                               | 0.22                 | 0.22                 | 0.24                   | 0.24                | 0.23                   | 0.23                |
| <b>Panel D: Severe Food Insecurity (Raw Score &gt; 7)</b>   |                      |                      |                        |                     |                        |                     |
| After COVID started                                         | -0.0111<br>(0.0119)  | -0.0111<br>(0.0169)  | -0.0183<br>(0.0164)    | -0.0183<br>(0.0232) | -0.0120<br>(0.0137)    | -0.0120<br>(0.0194) |
| Urban                                                       |                      |                      | -0.0192<br>(0.0138)    |                     |                        |                     |
| After COVID started × Urban                                 |                      |                      | 0.0247<br>(0.0180)     | 0.0247<br>(0.0254)  |                        |                     |
| Bamako                                                      |                      |                      |                        |                     | -0.00679<br>(0.0131)   |                     |
| After COVID started × Bamako                                |                      |                      |                        |                     | 0.00667<br>(0.0167)    | 0.00667<br>(0.0236) |
| Household FEs                                               | No                   | Yes                  | No                     | Yes                 | No                     | Yes                 |
| Missing Control                                             | No                   | No                   | No                     | No                  | No                     | No                  |
| Baseline Mean                                               | 0.03                 | 0.03                 | 0.04                   | 0.04                | 0.03                   | 0.03                |

*Notes:* In columns (1) and (2), the “Baseline Mean” represents the pre-pandemic mean of the outcome variable in each panel. In the last four columns, the “Baseline Mean” represents the pre-pandemic mean of the outcome variable in the comparison area—e.g., rural areas in columns (3) and (4) and non-Bamako areas in columns (5) and (6). Standard errors are clustered at the sampling cluster level. \*\*\*, \*\*, and \*, in each graph’s label indicate statistical significance at the 1, 5, and 10 percent critical level, respectively.

Table A6: Robustness—Excluding Bamako

|                                                             | First-Difference    |                     | Urban-Rural DID       |                     |
|-------------------------------------------------------------|---------------------|---------------------|-----------------------|---------------------|
| <b>Panel A: Standardized Raw FIES Score</b>                 |                     |                     |                       |                     |
| After COVID started                                         | 0.120*<br>(0.0629)  | 0.126<br>(0.0902)   | 0.0856<br>(0.0755)    | 0.0912<br>(0.108)   |
| Urban                                                       |                     |                     | -0.194**<br>(0.0779)  |                     |
| After COVID started × Urban                                 |                     |                     | 0.190**<br>(0.0924)   | 0.192<br>(0.132)    |
| Baseline Mean                                               | 0.12                | 0.12                | 0.16                  | 0.16                |
| <b>Panel B: Mild Food Insecurity (Raw Score &gt; 0)</b>     |                     |                     |                       |                     |
| After COVID started                                         | 0.0315<br>(0.0279)  | 0.0317<br>(0.0396)  | 0.0235<br>(0.0336)    | 0.0230<br>(0.0476)  |
| Urban                                                       |                     |                     | -0.0870**<br>(0.0376) |                     |
| After COVID started × Urban                                 |                     |                     | 0.0448<br>(0.0429)    | 0.0482<br>(0.0601)  |
| Baseline Mean                                               | 0.61                | 0.61                | 0.63                  | 0.63                |
| <b>Panel C: Moderate Food Insecurity (Raw Score &gt; 3)</b> |                     |                     |                       |                     |
| After COVID started                                         | -0.0387<br>(0.0249) | -0.0377<br>(0.0357) | -0.0534*<br>(0.0297)  | -0.0528<br>(0.0426) |
| Urban                                                       |                     |                     | -0.0655**<br>(0.0294) |                     |
| After COVID started × Urban                                 |                     |                     | 0.0819**<br>(0.0364)  | 0.0832<br>(0.0520)  |
| Baseline Mean                                               | 0.23                | 0.23                | 0.24                  | 0.24                |
| <b>Panel D: Severe Food Insecurity (Raw Score &gt; 7)</b>   |                     |                     |                       |                     |
| After COVID started                                         | -0.0125<br>(0.0139) | -0.0116<br>(0.0196) | -0.0187<br>(0.0166)   | -0.0178<br>(0.0235) |
| Urban                                                       |                     |                     | -0.0258*<br>(0.0142)  |                     |
| After COVID started × Urban                                 |                     |                     | 0.0345*<br>(0.0196)   | 0.0338<br>(0.0276)  |
| Household FEs                                               | No                  | Yes                 | No                    | Yes                 |
| Missing Control                                             | Yes                 | Yes                 | Yes                   | Yes                 |
| Baseline Mean                                               | 0.03                | 0.03                | 0.04                  | 0.04                |

*Notes:* In columns (1) and (2), the “Baseline Mean” represents the pre-pandemic mean of the outcome variable in each panel. In the last four columns, the “Baseline Mean” represents the pre-pandemic mean of the outcome variable in the comparison area—e.g., rural areas in columns (3) and (4) and non-Bamako areas in columns (5) and (6). Standard errors are clustered at the sampling cluster level. \*\*\*, \*\*, and \*, in each graph’s label indicate statistical significance at the 1, 5, and 10 percent critical level, respectively.
